# Supplementary material for: A High Copy Suppressor Screen for Autophagy Defects inSaccharomyces arl1Δ andypt6Δ Strains
Source: Oxford University Press journal article supplement (doi:10.1534/g3.116.035998), 2017-02-01
Supplement: 035998_files1.pdf [file 035998_files1.pdf]

## REFERENCES

- Gelperin, D. M., M. A. White, M. L. Wilkinson, Y. Kon, L. A. Kung *et al.*, 2005 Biochemical and genetic analysis of the yeast proteome with a movable ORF collection. *Genes Dev* 19: 2816-2826.
- Hill, J. E., A. M. Myers, T. J. Koerner and A. Tzagoloff, 1986 Yeast/E. coli shuttle vectors with multiple unique restriction sites. *Yeast* 2: 163-167.
- Nasmyth, K. A., and S. I. Reed, 1980 Isolation of genes by complementation in yeast: molecular cloning of a cell-cycle gene. *Proc Natl Acad Sci U S A* 77: 2119-2123.
- Rosenwald, A. G., M. A. Rhodes, H. Van Valkenburgh, V. Palanivel, G. Chapman *et al.*, 2002 ARL1 and membrane traffic in *Saccharomyces cerevisiae*. *Yeast* 19: 1039-1056.
- Suzuki, K., T. Kirisako, Y. Kamada, N. Mizushima, T. Noda *et al.*, 2001 The pre-autophagosomal structure organized by concerted functions of APG genes is essential for autophagosome formation. *EMBO J* 20: 5971-5981.
- Yang, S., and A. G. Rosenwald, 2016 Autophagy in *Saccharomyces cerevisiae* requires the monomeric GTP-binding proteins, Arl1 and Ypt6. *Autophagy*: 1-17.
