# Supplementary material for: A High Copy Suppressor Screen for Autophagy Defects inSaccharomyces arl1Δ andypt6Δ Strains
Source: Oxford University Press journal article supplement (doi:10.1534/g3.116.035998), 2017-02-01
Supplement: 035998_tables1.pdf [file 035998_tables1.pdf]

**Table S1 Plasmids used in the study**

| Plasmid name | Description                       | Sources                        |
|--------------|-----------------------------------|--------------------------------|
| pGFP-AUT7    | pRS316-GFP-ATG8                   | (SUZUKI <i>et al.</i> 2001)    |
| YEp352       | 2 $\mu$ vector, <i>URA3</i>       | (HILL <i>et al.</i> 1986)      |
| pARY1-3      | <i>ARL1</i> (wild type) in YEp352 | (ROSENWALD <i>et al.</i> 2002) |
| pRS316-YPT6  | <i>YPT6</i> (wild type) in pRS316 | (YANG AND ROSENWALD 2016)      |
| YEp13-COG4   | <i>COG4</i> in YEp13              | (NASMYTH AND REED 1980)        |
| YEp13-SNX4   | <i>SNX4</i> in YEp13              | (NASMYTH AND REED 1980)        |
| pTAX4        | <i>TAX4</i> in pGB1805            | (GELPERIN <i>et al.</i> 2005)  |
| pIVY1        | <i>IVY1</i> in pGB1805            | (GELPERIN <i>et al.</i> 2005)  |
| pATG5        | <i>ATG5</i> in pGB1805            | (GELPERIN <i>et al.</i> 2005)  |
| pPEP3        | <i>PEP3</i> in pGB1805            | (GELPERIN <i>et al.</i> 2005)  |
| pSLT2        | <i>SLT2</i> in pGB1805            | (GELPERIN <i>et al.</i> 2005)  |
