# Supplementary material for: A High Copy Suppressor Screen for Autophagy Defects inSaccharomyces arl1Δ andypt6Δ Strains
Source: Oxford University Press journal article supplement (doi:10.1534/g3.116.035998), 2017-02-01
Supplement: 035998_tables2.pdf [file 035998_tables2.pdf]

**Table S2. Genomic fragments identified from the high copy suppressors for *arl1Δ*.**

| <b>Chromosomal Position</b> | <b>Number of isolates</b> | <b>ORFs</b>                                      | <b>Descriptions of proteins expressed by the potential suppressors genes (membrane traffic and autophagy regulators)</b>                              |
|-----------------------------|---------------------------|--------------------------------------------------|-------------------------------------------------------------------------------------------------------------------------------------------------------|
| II 565073..575246           | 3                         | <i>YSY6; ARL1; UBS1; TYR1; POP7; EXO5; PEX32</i> | ARF like small GTP binding protein.                                                                                                                   |
| XVI 736052..739759          | 1                         | <b><i>COG4</i></b>                               | Essential component of the COG complex, intra-Golgi retrograde traffic.                                                                               |
| XII 668013..669540          | 1                         | <b><i>YPT6; VPS63</i></b>                        | Small GTP-binding protein from the Rab family.                                                                                                        |
| XII 667891..670087          | 1                         | <b><i>YPT6; VPS63; TMA7</i></b>                  | Small GTP-binding protein from the Rab family.                                                                                                        |
| X 274283..280632            | 1                         | <i>ALY2; TAX4</i>                                | EH domain-containing protein; involved in regulating phosphatidylinositol 4,5-bisphosphate levels and autophagy, for targeting Atg17 to PAS.          |
| X 377905..380245            | 2                         | <b><i>SNX4</i></b>                               | Sorting nexin; involved in retrieval of late-Golgi SNAREs from post-Golgi endosomes to the trans-Golgi network and in cytoplasm to vacuole transport. |
| VIII 165120..171159         | 1                         | <i>YHI9; SLT2; DAP2 (partial)</i>                | Serine/threonine MAP kinase, required for mitophagy and pexophagy.                                                                                    |
| I 164454..168712            | 1                         | <i>BUD14 (Partial)</i>                           |                                                                                                                                                       |
| II 153600..157666           | 1                         | <i>STU1 partial</i>                              |                                                                                                                                                       |
| II 591904..599696           | 1                         | <i>SMP1; YBR182c-a; YPC1; YBR184w; MBA1</i>      |                                                                                                                                                       |
| II 647822..652951           | 1                         | <i>NGR1; MET8; SDS24</i>                         |                                                                                                                                                       |
| IV 453510..463729           | 1                         | <i>RCR2; RAD57; MAF1; SOK1; TRP1</i>             |                                                                                                                                                       |
| IV 660744..666661           | 1                         | <i>SPO71; TMS1</i>                               |                                                                                                                                                       |
| IV 1014928..1024019         | 1                         | <i>RNH202; RRP45; PHM6</i>                       |                                                                                                                                                       |
| V 518873..524809            | 1                         | <i>BCK2 (partial); CCA1; RPH1 (partial)</i>      |                                                                                                                                                       |
| X 655992..661260            | 1                         | <i>VPS70; RSF2 (Partial)</i>                     |                                                                                                                                                       |

**Table S2. (cont.)**

| <b>Chromosomal Position</b> | <b>Number of isolates</b> | <b>ORFs</b>                                   | <b>Descriptions of proteins expressed by the potential suppressors genes (membrane traffic and autophagy regulators)</b> |
|-----------------------------|---------------------------|-----------------------------------------------|--------------------------------------------------------------------------------------------------------------------------|
| XI 26540..34270             | 1                         | <i>DOA1; OXP1; YRA2</i>                       |                                                                                                                          |
| XII 824347..825355          | 1                         | <i>KAP95 (Partial); DIC1</i>                  |                                                                                                                          |
| XIII 293842..298645         | 1                         | <i>SEC59</i>                                  |                                                                                                                          |
| XIV 400634..406605          | 1                         | <i>NCS2; DCP2</i>                             |                                                                                                                          |
| XIV 425995..431126          | 1                         | <i>MET4</i>                                   |                                                                                                                          |
| XIV 438449..444295          | 1                         | <i>RAS2; OCA1; PHO23; RPS7B</i>               |                                                                                                                          |
| XIV 484113..486011          | 2                         | <i>APJ1; MKS2</i>                             |                                                                                                                          |
| XIV 499400..504947          | 1                         | <i>YNL067W-B; RPL9B; SUN4; AQR1 (partial)</i> |                                                                                                                          |
| XIV 736086..743426          | 1                         | <i>MNT4; FRE4; YNR061C</i>                    |                                                                                                                          |
| XV 869387..871541           | 1                         | <i>YOR296w</i>                                |                                                                                                                          |
| XVI 764542..770706          | 1                         | <i>MRI1</i>                                   |                                                                                                                          |
