# Supplementary material for: A High Copy Suppressor Screen for Autophagy Defects inSaccharomyces arl1Δ andypt6Δ Strains
Source: Oxford University Press journal article supplement (doi:10.1534/g3.116.035998), 2017-02-01
Supplement: 035998_tables3.pdf [file 035998_tables3.pdf]

**Table S3. Genomic fragments identified from the high copy suppressors for *ypt6Δ*.**

| <b>Chromosomal Position</b> | <b>Number of isolates</b> | <b>ORFs</b>                                       | <b>Descriptions of proteins expressed by the potential suppressors genes (membrane traffic and autophagy regulators)</b>                                                                                    |
|-----------------------------|---------------------------|---------------------------------------------------|-------------------------------------------------------------------------------------------------------------------------------------------------------------------------------------------------------------|
| XII:666378..674078          | 1                         | <i>VPS63, YPT6, TMA7, RED1, RPS28B</i>            | Rab family GTPase; Ras-like GTP binding protein involved in the secretory pathway, required for fusion of endosome-derived vesicles with the late Golgi.                                                    |
| XVI 266824..272516          | 1                         | <i>YPL150W, ATG5</i>                              | Undergoes conjugation with Atg12p to form a complex involved in Atg8p lipidation.                                                                                                                           |
| IV 924504..930158           | 1                         | <i>IVY1, COX20, HEM1</i>                          | Phospholipid-binding protein that interacts with both Ypt7p and Vps33p, localizes to the rim of the vacuole as cells approach stationary phase.                                                             |
| XII:434079..453601          | 1                         | <i>PEP3, YLR149c, PCD1, YLR152c, ACS2, RNH203</i> | Component of CORVET membrane tethering complex; vacuolar peripheral membrane protein that promotes vesicular docking/fusion reactions in conjunction with SNARE proteins, required for vacuolar biogenesis. |
| III:8145..14287             | 1                         | <i>VBA3</i>                                       |                                                                                                                                                                                                             |
| IV:829784..836624           | 1                         | <i>ATC1, UPS3, YDR186c</i>                        |                                                                                                                                                                                                             |
| VII:33417..36181            | 1                         | <i>PDE1, ZIP2</i>                                 |                                                                                                                                                                                                             |
| XII:461554..462885          | 1                         | <i>YLR154C-G</i>                                  |                                                                                                                                                                                                             |
| XIII:29734..34906           | 1                         | <i>NGL3, TML119w</i>                              |                                                                                                                                                                                                             |
| XVI:832730..840723          | 1                         | <i>PIN3, NCA2, TPO3</i>                           |                                                                                                                                                                                                             |
